# Supplementary material for: Social tipping dynamics for stabilizing Earth’s climate by 2050
Source: PubMed Central journal article supplement (PMC7007533; doi:10.1073/pnas.1900577117), 2020-01-21

# Social tipping dynamics for stabilizing Earth's climate by 2050

## Supporting information

### Table of content

|                                                                                                                            |   |
|----------------------------------------------------------------------------------------------------------------------------|---|
| Organization of the expert elicitation process.....                                                                        | 2 |
| Formal definition and filtering of social tipping elements for decarbonization that was used in the literature review..... | 6 |
| Online expert survey .....                                                                                                 | 8 |

## Organization of the expert elicitation process

### Expert Survey

The primary data collection tool was an online expert survey that was sent to over 1000 international experts through a private message or addressed through mailing lists of organizations in the field of climate change and sustainability. The online survey contained a welcome page explaining the research objectives and presetting the research team, a page with definitions and terminology used in the research, the main survey page where we asked for the description of the candidate for social tipping element, that was followed by a page gathering personal information such as self-assessed expertise level, field of work, residence country, gender and age. The final page contained a lottery where all experts who completed the survey could win a book. The survey run for 2.5 months starting mid-September 2016 and was closed at the end of November 2016.

In the main part of the survey, the survey participants were asked to name and describe the candidate for the social tipping elements, explain the tipping mechanism, as well as the geographical and governance level where it might be occurring, relevant actors, and estimate their confidence level that this social tipping element will be actually occurring and leading to a decarbonization by 2050. The experts could nominate up to 6 candidates for social tipping elements and the answers could be supported by scientific references.

The main content questions asked in the survey included:

1. What is the most important social tipping element that could initiate a socially and economically disruptive transformation leading to a complete decarbonization by 2050? The "social" component of the term is used very broadly, and could for example refer to policies, economic mechanisms, technologies and social value changes.
2. (Optional) What is the relevant geographical region, governance scale and/or socio-economic sector where the social tipping element would occur?
3. (Optional) Who are the relevant actors (e.g. the public, government, industry) that could play a role in leveraging the tipping element to a larger scale?
4. (Optional) How confident are you that the associated social tipping point is actually going to take place and contribute substantially to a rapid and complete global decarbonization by 2050?

In addition, the survey included questions about the self-expertise assessment of the experts and the background (education level, field of expertise, type of sector) and personal information (gender, age, the country of residence).

The online survey was completed by 133 experts. In total they suggested 207 candidates for social tipping elements. Five answers that were either in contrary with achieving SDG (i.e. killing majority of human population) or located outside the human agency (alien intervention, terminal disease spread) were excluded from further analysis. Nine percent of the experts ranked themselves as leading experts in the field, nearly 39% as one having a specialized expertise on the topic of the survey, 26% as having a general expertise, 19.5% stated that the topic of the survey is related to their expertise and finally 7% admitted that the topic of the survey is not one of areas of their expertise. Nearly 80% of the experts were representing various research sectors, 9% business and industry, 8%

NGOs and civil organizations, 3% governmental organizations. Fifty six percent of respondents declared Europe as their primary place of residence and work, for 19% it was North America, for 13% Asia, 4% lived in Africa, and 2% in Australia and New Zealand. Most of the survey experts were male (71%), and most of the experts who took part in the research were in the age group of 30-39 years old (31%) or 40-49 years old (28%).

The length of experts' responses and social tipping element descriptions varied from using just a few words to answers reaching over 4,400 words. Although the definition of social tipping elements was provided to the survey participants, some experts who took part in the research did not follow the definition, and provided examples of particular interventions leading to social tipping rather than naming and describing the social tipping elements. Using qualitative data analysis we grouped the answers in twelve basic categories of social tipping elements presented in Table 2 in the manuscript.

### Expert Workshop

A selected group of 17 experts were invited to take part in an expert workshop that focused on choosing the top candidates for social tipping elements instrumental for decarbonization by 2050, differentiating the tipping interventions, key actors, and assessing the interactions between the social tipping elements. The workshop took place in December 2016 at the Stockholm Resilience Center in Sweden. The Stockholm Resilience Center covered the costs of workshop attendance of those workshop participants who reported to have problems with travel funding at their home organizations. The workshop participants received a shortened version of the expert survey answers one week before the workshop. The workshop resulted in choosing eight top candidates for social tipping elements and 10 candidates for social tipping interventions.

**Table SI1: Invited expert workshop participants**

| Name                  | Affiliation                                                                        | Sector / type of work | Country               |
|-----------------------|------------------------------------------------------------------------------------|-----------------------|-----------------------|
| Ilona M. Otto         | Potsdam Institute for Climate Impact Research                                      | Research              | Germany and Poland    |
| Johan Rockström       | Stockholm Resilience Center                                                        | Research              | Sweden                |
| Jonathan F. Donges    | Potsdam Institute for Climate Impact Research                                      | Research              | Germany               |
| Avit K. Bhowmik       | Stockholm Resilience Center                                                        | Research              | Sweden and Bangladesh |
| Roger Cremades        | Climate Service Center                                                             | Research              | Germany and Spain     |
| Franziska Allerberger | Graz University                                                                    | Master student        | Austria               |
| Wolfgang Lucht        | Potsdam Institute for Climate Impact Research                                      | Research              | Germany               |
| Richard Hewitt        | James Hutton Institute                                                             | Research              | UK                    |
| Jennifer Hinton       | Stockholm Resilience Center                                                        | Research              | Sweden and USA        |
| Mark McCaffrey        | Centre for Sustainable Development Studies, National University for Public Service | Research              | Hungary               |
| Detlef van Vuuren     | BL Netherlands Assessment Agency                                                   | Research / Policy     | The Netherlands       |
| Nerea Moran           | University of Madrid                                                               | Research              | Spain                 |
| Alex Lenferna         | University of Washington                                                           | PhD student           | USA                   |
| James Greyson         | BlindSpot Think Tank                                                               | NGO                   | UK                    |
| Yuyun Ismawati*       | Balifocus                                                                          | NGO                   | Indonesia             |
| Sylvanus Doe          | Geospecies Consult                                                                 | NGO                   | Ghana                 |
| Benoit Faraco         | European Climate Foundation                                                        | Policy                | France                |

\* Did not show up at the workshop due to unexpected travel difficulties

**Table S12:** Candidates for social tipping elements and social tipping interventions selected by the workshop participants.

| Social tipping element        | Social tipping intervention                                                                                                       |
|-------------------------------|-----------------------------------------------------------------------------------------------------------------------------------|
| Norms and value system        | Recognizing the immoral character of fossil fuels                                                                                 |
| Knowledge system              | Transformative narrative emphasizing the benefits to be gained by decarbonization;<br>Developing alternative welfare measurements |
| Education system              | Climate education and engagement                                                                                                  |
| Energy production and storage | Subsidy programs;<br>Decentralized energy generation                                                                              |
| Human settlements             | Carbon-neutral cities                                                                                                             |
| Citizenship involvement       | A global network of social movements                                                                                              |
| Financial markets             | Divestment movement                                                                                                               |
| Information feedbacks         | Emission information disclosure                                                                                                   |

### Literature review guidelines

The selected by the workshop participants top candidates for social tipping elements and tipping interventions were furthermore analyzed in a literature review process that aimed at finding out empirical examples demonstrating the potential to reduce the greenhouse gas emissions by the nominated candidates for social tipping interventions as well as estimating the time needed to trigger the social tipping within the distinguished candidates for social tipping elements. The workshop participants were given a chance to contribute to the literature review. Those who positively responded and submitted the literature review on the selected candidates for social tipping interventions joined the paper author team. The literature review resulted in differentiating the final set of social tipping elements and social tipping interventions presented in the manuscript (Tab. 3 in the manuscript).

The literature review guidelines included the following instruction:

Please write about 1 page input on the social tipping element that you lead. Before you start, please read the formal definition of social tipping elements. Please structure the literature review according to the following topics:

1. A brief description of the social tipping element candidate.
  - a. What is the key intervention of interest?
  - b. Why is this social tipping element relevant for a rapid decarbonization? How can this relevance be measured or judged?
  - c. What are the parameter(s) projecting onto the control  $p$ , and their value(s) near  $p_{crit}$ ? I.e. is there an observable and quantifiable/measurable threshold or evidence from it on the literature?
  - d. Is the social tipping element related behavior observable and can it be imitated?
  - e. Where (region) and on which scale does it occur (local, national, regional, global)?

2. What is the mechanism of tipping?
  - a. Who are the relevant actors and how do they interact? Does the social tipping element provide (co-)benefits for those actors involved?
  - b. Is there a self-reinforcing accelerating feedback implying that a small change in the subsystem can lead to big impacts on the whole system?
  - c. What are the involved variables and processes?
3. What is the time needed to trigger the tipping process (human intervention/decision-making time  $T_H$ ) and what is the time needed to complete the tipping process and to observe the qualitative change in the system (transition time  $T$ )?
4. Are there other related factors that amplify the effect of this STE on decarbonization (interaction with other tipping elements)?
5. What are the associated uncertainties specifically regarding the critical threshold value and time scales?

# Formal definition and filtering of social tipping elements for decarbonization that was used in the literature review

## Motivation and filtering

The elicitation as evaluated by our STE workshop provided a **list of candidate social tipping elements** for decarbonization. This list now has to be **filtered, using 2 criteria**

1. Is there a scientific literature that allows to put the argument on the social tipping element on a solid footing (not scientific consensus needed, just a credible case)?
2. Does the social tipping element candidate fulfill the criteria of a formal definition (see below) of what an STE is (as opposed to some other important social-economic process)?

## Formal definition

To be considered a social tipping element relevant for decarbonization, a candidate  $\Sigma$  must fulfill the following criteria based on the definition by John Schellnhuber of tipping elements used in Lenton et al. (2008):

1. **(Existence of a tipping point)** The parameters controlling the social-economic subsystem  $\Sigma$  can be transparently combined into a single control  $\rho$ , and there exists a critical control value  $\rho_{\text{crit}}$  from which any significant variation by  $\delta\rho > 0$  leads to a qualitative change ( $\hat{F}$ ) in a crucial system feature  $F$ , after some observation time  $T > 0$ , measured with respect to a reference feature at the critical value, i.e.,

$$|F(\rho \geq \rho_{\text{crit}} + \delta\rho|T) - F(\rho_{\text{crit}}|T)| \geq \hat{F} > 0. \quad \mathbf{[1]}$$

This inequality applies to forcing trajectories for which a slight deviation above a critical value that continues for some time inevitably induces a qualitative change. This change may occur immediately after the cause or much later. The definition encompasses equilibrium properties with threshold behavior as well as critical rates of forcing. In its equilibrium application, it includes all orders of phase transition and the most common bifurcations: saddle-node and Hopf bifurcations.

Here we restrict ourselves to social tipping elements that may be accessed by human agency through a specific human intervention. We define the subset of relevant social tipping elements for decarbonization by adding to condition 1 the following *normative* conditions:

2. **(Human intervention time horizon)** Human activities are interfering with the system  $\Sigma$  such that decisions taken within a "human intervention time horizon" ( $T_H > 0$ ) can determine whether the critical value for the control  $\rho_{\text{crit}}$  is reached. This occurs at a critical time ( $t_{\text{crit}}$ )

that is usually within  $T_H$  but may be later because of a commitment to further change made during  $T_H$ .

3. **(Decarbonization time horizon)** The time to observe a qualitative change plus the time to trigger it lie within a “decarbonization time horizon” ( $T_D$ );  $t_{\text{crit}} + T \leq T_D$ .  $T_D$  recognizes that events manifesting too far away in the future are not relevant for achieving the goal of rapid decarbonization of the global social-economic system.
4. **(Relevance for decarbonization)** The qualitative change in system  $\Sigma$  contributes significantly to decarbonization of the global social-economic system. A qualitative change should correspondingly be defined in terms of impacts such as expected emissions reductions.

### Relevant time horizons for filtering STEs

- **Human intervention time horizon:**  $T_H = 1 - 10$  years, since time until 2050 is short.
- **Decarbonization time horizon:**  $T_D$  is determined by the goal of full decarbonization of the global social-economic system by 2050. Since we are in 2017 now,  $T_D = 33$  years.

### Questions for literature review arising from this definition

- What are the potentially relevant social tipping elements for decarbonization?
- What is the specific human intervention activating the tipping mechanism?
- And for each social tipping element:
  - What is the mechanism of tipping?
  - What is the key feature  $F$  of interest?
  - What are the parameter(s) projecting onto the control  $\rho$ , and their value(s) near  $\rho_{\text{crit}}$ ?
  - How long is the transition time  $T$ ?
  - What are the associated uncertainties?

### References

Lenton, T. M., Held, H., Kriegler, E., Hall, J. W., Lucht, W., Rahmstorf, S., & Schellnhuber, H. J. (2008). Tipping elements in the Earth's climate system. *Proceedings of the National Academy of Sciences USA*, 105(6), 1786-1793.

## Fragebogen

## 1 Welcome

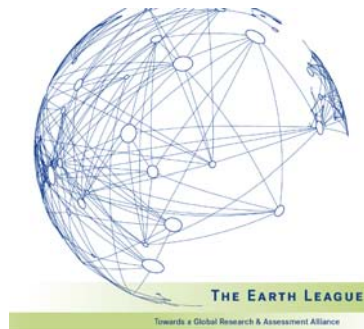

## Questionnaire for experts

## Disruptive social tipping elements for a rapid decarbonization

If the Sustainable Development Goals and the Paris Climate Agreement are taken seriously, then a global sustainability transition could be achieved in the next 20 years and take us to a more equitable and just global society operating within the planetary boundaries. The central prerequisite for such a global sustainability transition is rapid decarbonization. By decarbonization we mean a complete transition in the energy system away from carbon-intensive fossil fuels<sup>1</sup>. While many researchers are focusing on incremental changes and the gradual phasing out of coal, we would like to identify social processes and leverages that could cause *abrupt changes triggering rapid decarbonization*.

We are asking you to nominate candidates for social tipping elements that could lead to a disruptive change and a rapid emergence of a new type of a fossil-free economy.

Before you start the survey it is useful to be clear about the [concept and terminology](#). Similarly to Lenton and his co-authors<sup>2</sup>, we use the term tipping element to describe a subsystem where a small change or innovation can tip the system into a qualitatively different state. Our understanding of the "social" component is very broad and could refer to social, economic and political mechanisms as well as to technologies that could substantially change the socio-ecological relationships. A social tipping element could be for example a policy that shuts down coal power plants or stops production of new cars that run on fossil fuels, or a social value shift that would lead to a rapid decarbonization. Our research has an explorative character and it is one of our goals to clarify the meaning of social tipping elements. Here is a graphical illustration of the concept:

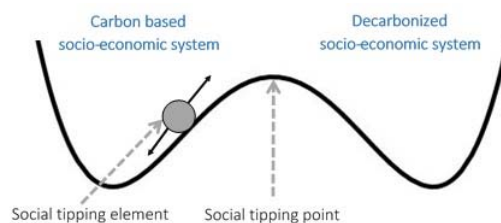

The questionnaire has only five pages. At the end of the questionnaire you will be asked whether you are interested in taking part in a [workshop](#) that will synthesize the findings from this questionnaire and that will take place in fall 2016 at the Stockholm Resilience Center, Sweden. On the last page there will also be a chance to win a [book](#).

We follow common data protection policies and, hence, your personal information will remain anonymous. Providing your name and your full institutional affiliation is optional. If you want to go back to the previous pages during filling in the questionnaire and keep the text that you entered, please use the **"Back"** button located in the **left bottom corner of each page**.

With best regards,

Johan Rockström and the Earth League.

Research team:

Ilona. M. Otto

Jonathan F. Donges

Franziska Allerberger

In case of problems and questions please contact [ilona.otto@pik-potsdam.de](mailto:ilona.otto@pik-potsdam.de)

## References

1. Fisher, B.S., N. Nakicenovic, K. Alfsen, et al. (2007) Issues related to mitigation in the long term context, In: Climate Change 2007: Mitigation. Contribution of Working Group III to the Fourth



Assessment Report of the Intergovernmental Panel on Climate Change, Cambridge University Press, Cambridge.

2. Lenton, T.M., et al. (2008) Tipping elements in the Earth's climate system, PNAS 105(6): 1786-1793.

---

## 2 Question 1

---

### Page 1.A

**1. What is, in your opinion, the most important social tipping element that could initiate a socially and economically disruptive transformation leading to a complete decarbonization by 2030?**

The "social" component of the term is used very broadly, and could for example refer to policies, economic mechanisms, technologies and social value changes.

Briefly explain why you have chosen this tipping element, and state your arguments why it could induce a rapid decarbonization. If possible, please include the references and links to the relevant sources. The subsequent questions will ask for more specific characteristics. **Please describe only one social tipping element on this page. When you click the "Continue" button, you will have the option to suggest other tipping elements.**

**2. What is the relevant geographical region, governance scale or socio-economic sector where the social tipping element would occur?**

**3. Who are the relevant actors (e.g. the public, government, industry) that could play a role in leveraging the tipping element to a larger scale?**

**4. Can a threshold value of the associated tipping point be estimated, e.g. a certain percentage of market share that has to be achieved for a new technology to take off?**

If relevant, please provide the minimum and maximum estimate and/or the uncertainty range.

**5. How confident are you that the described phenomenon is indeed a social tipping element that could lead to a rapid and complete global decarbonization by 2030?**

Please select the option.

- Very uncertain
- Uncertain
- Rather uncertain
- Rather confident
- Confident
- Very confident

**6. How confident are you that the associated social tipping point is actually going to take place and lead to a rapid and complete global decarbonization by 2030?**

Please select the option.

- Very uncertain
- Uncertain
- Rather uncertain
- Rather confident

- Confident
- Very confident

---

## 2.1 Tipping element 2

---

### Page 2.A

Would you like to suggest one more social tipping element?

Please select the option.

- Yes
- No

---

## 3.1 Filter

---

### Page 1.B

1. In your opinion, what is the second most important social tipping element for a rapid and complete decarbonization by 2030?

Briefly explain why you have chosen this tipping element, and state your arguments why it could induce a rapid decarbonization. If possible, please include the references and links to the relevant sources. Please describe only one social tipping element on this page. When you click the "Continue" button, you will have the option to suggest other tipping elements.

2. What is the relevant geographical region, governance scale or socio-economic sector where the social tipping element would occur?

3. Who are the relevant actors (e.g. the public, government, industry) that could play a role in leveraging the tipping element to a larger scale?

4. Can a threshold value of the associated tipping point be estimated, e.g. a certain percentage of market share that has to be achieved for a new technology to take off?

If relevant, please provide the minimum and maximum estimate and/or the uncertainty range.

5. How confident are you that the described phenomenon is indeed a social tipping element that could lead to a rapid and complete global decarbonization by 2030?

Please select the option.

- Very uncertain
- Uncertain
- Rather uncertain
- Rather confident
- Confident
- Very confident

6. How confident are you that the associated social tipping point is actually going to take place and lead to a rapid and complete global decarbonization by 2030?

Please select the option.

- Very uncertain
- Uncertain
- Rather uncertain

- Rather confident
- Confident
- Very confident

---

#### 4.1 Filter Tipping point 3

---

Page 2.C

**Would you like to suggest one more social tipping element?**

Please select the option.

- Yes
- No

---

#### 5.1 Filter

---

Page 1.C

**1. In your opinion, what is the third most important social tipping element for a rapid and complete decarbonization by 2030?**

Briefly explain why you have chosen this tipping element, and state your arguments why it could induce a rapid decarbonization. If possible, please include the references and links to the relevant sources. Please describe only one social tipping element on this page. When you click the "Continue" button, you will have the option to suggest other tipping elements.

**2. What is the relevant geographical region, governance scale or socio-economic sector where the social tipping element would occur?**

**3. Who are the relevant stakeholders (e.g. the public, government, industry) that could play a role in leveraging the tipping element to a larger scale?**

**4. Can a threshold value of the associated tipping point be estimated, e.g. a certain percentage of market share that has to be achieved for a new technology to take off?**

If relevant, please provide the minimum and maximum estimate and/or the uncertainty range.

**5. How confident are you that the described phenomenon is indeed a social tipping element that could lead to a rapid and complete global decarbonization by 2030?**

Please select the option.

- Very uncertain
- Uncertain
- Rather uncertain
- Rather confident
- Confident
- Very confident

**6. How confident are you that the associated social tipping point is actually going to take place and lead to a rapid and complete global decarbonization by 2030?**

Please select the option.

- Very uncertain
- Uncertain

- Rather uncertain
- Rather confident
- Confident
- Very confident

---

### 6.1 Filter Tipping point 3

---

#### Page 2.D

Would you like to suggest one more social tipping element?

Please select the option.

- Yes
- No

---

### 7.1 Filter

---

#### Page 1.D

1. In your opinion, what is the fourth most important social tipping element for a rapid and complete decarbonization by 2030?

Briefly explain why you have chosen this tipping element, and state your arguments why it could induce a rapid decarbonization. If possible, please include the references and links to the relevant sources. Please describe only one social tipping element on this page. When you click the "Continue" button, you will have the option to suggest other tipping elements.

2. What is the relevant geographical region, governance scale or socio-economic sector where the social tipping element would occur?

3. Who are the relevant actors (e.g. the public, government, industry) that could play a role in leveraging the tipping element to a larger scale?

4. Can a threshold value of the associated tipping point be estimated, e.g. a certain percentage of market share that has to be achieved for a new technology to take off?

If relevant, please provide the minimum and maximum estimate and/or the uncertainty range.

5. How confident are you that the described phenomenon is indeed a social tipping element that could lead to a rapid and complete global decarbonization by 2030?

Please select the option.

- Very uncertain
- Uncertain
- Rather uncertain
- Rather confident
- Confident
- Very confident

6. How confident are you that the associated social tipping point is actually going to take place and lead to a rapid and complete global decarbonization by 2030?

Please select the option.

- Very uncertain

- Uncertain
- Rather uncertain
- Rather confident
- Confident
- Very confident

---

### 8.1 Filter Tipping point 3

---

#### Page 3.E

Would you like to suggest one more social tipping element?

Please select the option.

- Yes
- No

---

### 9.1 Filter

---

#### Page 1.E

1. In your opinion, what is the fifth most important social tipping element for a rapid and complete decarbonization by 2030?

Briefly explain why you have chosen this tipping element, and state your arguments why it could induce a rapid decarbonization. If possible, please include the references and links to the relevant sources. Please describe only one social tipping element on this page. When you click the "Continue" button, you will have the option to suggest other tipping elements.

2. What is the relevant geographical region, governance scale or socio-economic sector where the social tipping element would occur?

3. Who are the relevant actors (e.g. the public, government, industry) that could play a role in leveraging the tipping element to a larger scale?

4. Can a threshold value of the associated tipping point be estimated, e.g. a certain percentage of market share that has to be achieved for a new technology to take off?

If relevant, please provide the minimum and maximum estimate and/or the uncertainty range.

5. How confident are you that the described phenomenon is indeed a social tipping element that could lead to a rapid and complete global decarbonization by 2030?

Please select the option.

- Very uncertain
- Uncertain
- Rather uncertain
- Rather confident
- Confident
- Very confident

6. How confident are you that the associated social tipping point is actually going to take place and lead to a rapid and complete global decarbonization by 2030?

Please select the option.

- Very uncertain
- Uncertain
- Rather uncertain
- Rather confident
- Confident
- Very confident

### 10.1 Filter Tipping point 3

#### Page 2.F

Would you like to suggest one more social tipping element?

Please select the option.

- Yes
- No

### 11.1 Filter

#### Page 1.F

If you would like to suggest more social tipping elements, please type and describe them shortly here.

### 12.1 Expertise evaluation

#### Page 3

How would you evaluate your expertise in the area of decarbonization and social transformation?

Please select one of the options.

- One of leading experts
- An expert
- Rather an expert
- Rather not an expert
- Not an expert

### 13 Test\_Personal\_Questions\_mixextern\_2

#### Page 4

##### 1. Your name (optional)

If you don't want to share your name, please leave this field empty.

##### 2. Your affiliation or employing organization (optional)

If you don't want to share your affiliation, please leave this field empty.

##### 3. What sector are you working for?

Please choose from the options below and specify if necessary.

- Government, politics and policy
- Other public sector
- Research (please specify)
 

Please select one of the options  
 Humanities  
 Performing or visual arts  
 Social sciences  
 Economics  
 Biological and medical sciences  
 Earth and environmental science  
 Physical sciences  
 Engineering and technology  
 Engineering and technology  
 Mathematics, statistics and inform  
 Interdisciplinary research
- NGO (please specify)
 

Please select one of the options  
 Civil society  
 Development  
 Environment

Business (please specify)

Please select one of the options  
Food, water and agriculture  
Finance, banking, economics  
Energy and resources  
Construction and infrastructure  
Health and wellbeing  
Manufacture  
Transport  
Chemicals, technology  
Telecommunication, media, ente

 Other**3. What sector are you working for? (obligatory)**

Please select from the options below.

 Research Humanities

- Performing or visual arts
- Social Sciences
- Economics
- Biological and medical sciences
- Earth and environmental sciences
- Physical sciences
- Engineering and technology
- Mathematics, statistics, information sciences
- Interdisciplinary research

 Business (please specify from list) Government, politics and policy Other public sector NGO (please specify from list) Other**4. What is your highest education degree? (obligatory)**

Please select one of the options.

- PhD, equivalent or higher
- Master or equivalent
- Bachelor or equivalent
- Secondary education or lower

**5. What was the field of your higher level studies? (obligatory)**

Please select one of the options.

- Humanities
- Performing or visual arts
- Social sciences
- Economics
- Biological and medical sciences
- Earth and environmental sciences
- Physical sciences
- Engineering and technology
- Mathematics, statistics, information sciences
- Interdisciplinary research

Other

**6. For how many years are you employed since the award of your highest qualification?**  
Please select one of the options.

**7. What is the country of your residence?**  
Please type your answer below.

**7. What is the country of your residence? (obligatory)**  
Please select one of the options.



Please select country

- Afghanistan
- Aland Islands
- Albania
- Algeria
- American Samoa
- Andorra
- Angola
- Anguilla
- Antarctica
- Antigua and Barbuda
- Argentina
- Armenia
- Aruba
- Australia
- Austria
- Azerbaijan
- Bahamas
- Bahrain
- Bangladesh
- Barbados
- Belarus
- Belgium
- Belize
- Benin
- Bermuda
- Bhutan
- Bolivia
- Bosnia and Herzegovina
- Botswana
- Bouvet Island
- Brazil
- British Indian Ocean territory
- Brunei Darussalam
- Bulgaria
- Burkina Faso
- Burundi
- Cambodia
- Cameroon
- Canada
- Cape Verde
- Cayman Islands
- Central African Republic
- Chad
- Chile
- China
- Christmas Island
- Cocos (Keeling) Islands
- Colombia
- Comoros
- Congo
- Congo, Democratic Republic
- Cook Islands
- Costa Rica
- Côte d'Ivoire (Ivory Coast)
- Croatia (Hrvatska)
- Cuba
- Cyprus
- Czech Republic
- Denmark
- Djibouti
- Dominica
- Dominican Republic
- East Timor
- Ecuador
- Egypt
- El Salvador
- Equatorial Guinea
- Eritrea
- Estonia
- Ethiopia
- Falkland Islands
- Faroe Islands
- Fiji
- Finland
- France
- French Guiana
- French Polynesia
- French Southern Territories
- Gabon
- Gambia
- Georgia
- Germany
- Ghana
- Gibraltar
- Greece
- Greenland
- Grenada
- Guadeloupe
- Guam
- Guatemala
- Guinea
- Guinea-Bissau
- Guyana
- Haiti
- Heard and McDonald Islands
- Honduras
- Hong Kong
- Hungary
- Iceland
- India
- Indonesia
- ...

**8. What is your age?**

Please select one of the options below.

Please select one of the options  
 18-29  
 30-39  
 40-49  
 50-59  
 60 or older  
 I prefer not to disclose

**9. What is your gender?**

Please select one of the options below.

Please select one of the options  
 Female  
 Male  
 I prefer not to disclose

**10. Are you interested in taking part in the synthesis workshop that will take place in fall 2016 at the Stockholm Resilience Center?**

Please select one of the options below.

- No
- Yes - please provide the e-mail address to which we could send a workshop invitation

**11. Do you have any comments or feedback on our research?**

Please type your comments below.

**14 Lottery**

Page 5 (the last one!)

1. Would you like to take part in a lottery and have a chance to win a copy of one of the books signed by the authors:

"Selbstverbrennung" by John Schellnhuber:

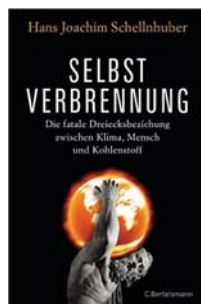

"Big World Small Planet" by Johan Rockström:

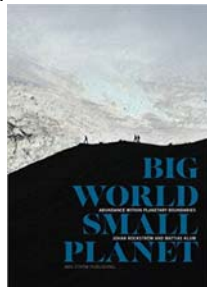

Please select one of the options

- No, I don't want to take part in the lottery.
- Yes, I would like to have a chance to win "Selbstverbrennung", here is my e-mail address to which you could send a notification if I win the book.
- Yes, I would like to have a chance to win "Big World Small Planet", here is my e-mail address to which you could send a notification if I win the book.

**2. Are you interested in getting a copy of the report presenting these research results?**

Please select one of the options

- No
- Yes, I would like to get a copy of the research report, here is my e-mail address to which you can send it.

**15 Endseite**

Thank you for taking our survey. We appreciate your time and expertise.

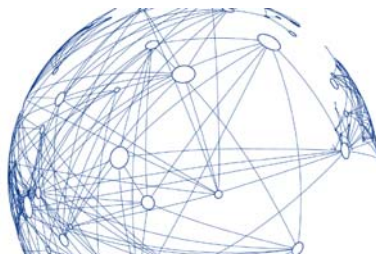

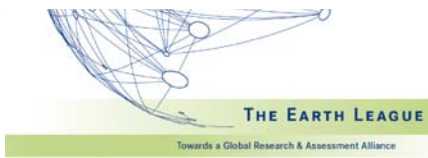

Supplement: pnas.1900577117.sapp.pdf [file pnas.1900577117.sapp.pdf]
